# Supplementary material
Source: HighWire-hosted journal article supplement (https://jnm.snmjournals.org/highwire/filestream/97849/field_highwire_adjunct_files/0/241364_Supplemental_Data.pdf)
Supplement: 241364_Supplemental_Data.pdf [file 241364_Supplemental_Data.pdf]

1 *Tracer Production.*  $^{18}\text{F}$ -BMT-187144 was produced as a precursor for the synthesis of  $^{18}\text{F}$ -  
2 BMS-986192 using a Zymark robotic system.  $^{18}\text{F}$ -fluoride was produced by irradiation of  $^{18}\text{O}$ - $\text{H}_2\text{O}$   
3 with an IBA Cyclone 18 twin cyclotron via the  $^{18}\text{O}(\text{p},\text{n})^{18}\text{F}$  nuclear reaction. The aqueous  $^{18}\text{F}$ -  
4 fluoride was passed through a Sep-Pak light QMA anion exchange cartridge (Waters,  
5 Netherlands) to recover the  $^{18}\text{O}$ -enriched water.  $^{18}\text{F}$ -fluoride was then eluted from the cartridge  
6 with 1 mg of potassium carbonate ( $\text{K}_2\text{CO}_3$ , Sigma-Aldrich) in 1 mL of water for injections (in-  
7 house) and collected in a vial with 15 mg of Kryptofix [2.2.2] (Merck). To the vial, 1 mL of dry  
8 acetonitrile (MeCN, Rathburn) was added and the solvents were evaporated at 130 °C. The  
9 radioactive residue ( $^{18}\text{F}$ -KF-Kryptofix complex) was dried three times by addition and  
10 evaporation of anhydrous MeCN (3x 0.5 mL at 130 °C). To the dried  $^{18}\text{F}$ -KF-Kryptofix complex,  
11 0.5 mL of BMT-180478 (4 mg/ml in DMSO, Bristol-Meyers Squibb) was added and was allowed  
12 to react at 120°C for 10 minutes. The mixture was then diluted in 1.5 mL of water for injections  
13 and purified by high-performance liquid chromatography (HPLC) using an Elite LaChrom Hitachi  
14 L-7100 pump system with a Luna column (5  $\mu\text{m}$ , 250 mm  $\times$  10 mm) equipped with both  
15 ultraviolet (UV) detection (Elite LaChrom VWR L-2400 UV detector set at 254 nm; Hitachi) and a  
16 Bicon radioactivity monitor. The product was eluted using a mobile phase of 32% MeCN in  
17 water with 0.1% trifluoroacetic acid (TFA, Sigma-Aldrich) and a flow rate of 4.6 mL/minute. The  
18 radioactive product, with a retention time of ~22 minutes, was collected in 80 mL water. The  
19 solution was then applied to a SepPak tC18 cartridge (Waters) and washed twice with 5 mL of  
20 water. The final product was eluted with 2 mL of ethanol and collected in a 2.5 mL conical vial.  
21 Then  $^{18}\text{F}$ -BMT-187144 was transferred to another hot cell equipped with a PharmTracer Eckert  
22 & Ziegler synthesis module. After drying of  $^{18}\text{F}$ -BMT-187144, 0.3 mL of a solution of BMT-

1 192920 precursor (4 mg/mL in DMSO, Bristol-Meyers Squibb) was added, followed by the  
2 addition of 0.1 mL water for injections. The mixture was allowed to react at 40 °C for 40  
3 minutes. After cooling to 25 °C, the reaction mixture was transferred to the HPLC injection vial.  
4 The reaction vial was then washed with 1 mL of water for injections, which was then also  
5 transferred to the HPLC injection vial. The diluted reaction mixture was purified by HPLC using a  
6 Yarra SEC-3000 column (5 µm, 300 mm × 7.8 mm) and 100% phosphate buffered saline as  
7 mobile phase with a flow rate of 1.2 mL/minute. <sup>18</sup>F-BMS-986192, with a retention time of  
8 approximately 10 minutes, was collected into a 25 mL sterile vial (Mallinckrodt) via a  
9 sterilization filter (Millex-LG filter, 25 mm diameter, 0.2 µm pore size, polytetrafluoroethylene  
10 membrane, Millipore). An additional 6 mL phosphate buffered saline was added to the sterile  
11 vial to obtain a total volume of approximately 8 mL. Ultra-performance liquid chromatography  
12 was used for analysis of (radio)chemical purity, radiochemical identity and molar activity. For  
13 this, a Waters Acquity H-Class system and a BEH Phenyl column (1.7 µm; 3.0 mm x 50 mm) was  
14 used, equipped with both an UV detector (operated at 280 nm) and a radioactivity detector  
15 (Berthold FlowStar LB513, Mx50-6 flow cell). Gradient elution with a mixture of 0.1% aqueous  
16 TFA in ultrapure water (solvent A) and 0.1% TFA in mass spectrometry-grade acetonitrile  
17 (solvent B) was performed at a flow of 0.8 mL/min. The following gradient profile was used: 0-6  
18 min 10-50% B, 6-8 min 50-70% B, 8-10 min 70-10% B. Retention times were 3.1 min for <sup>18</sup>F-BMT-  
19 187144 and 5.3 min for <sup>18</sup>F-BMS-986192.

20

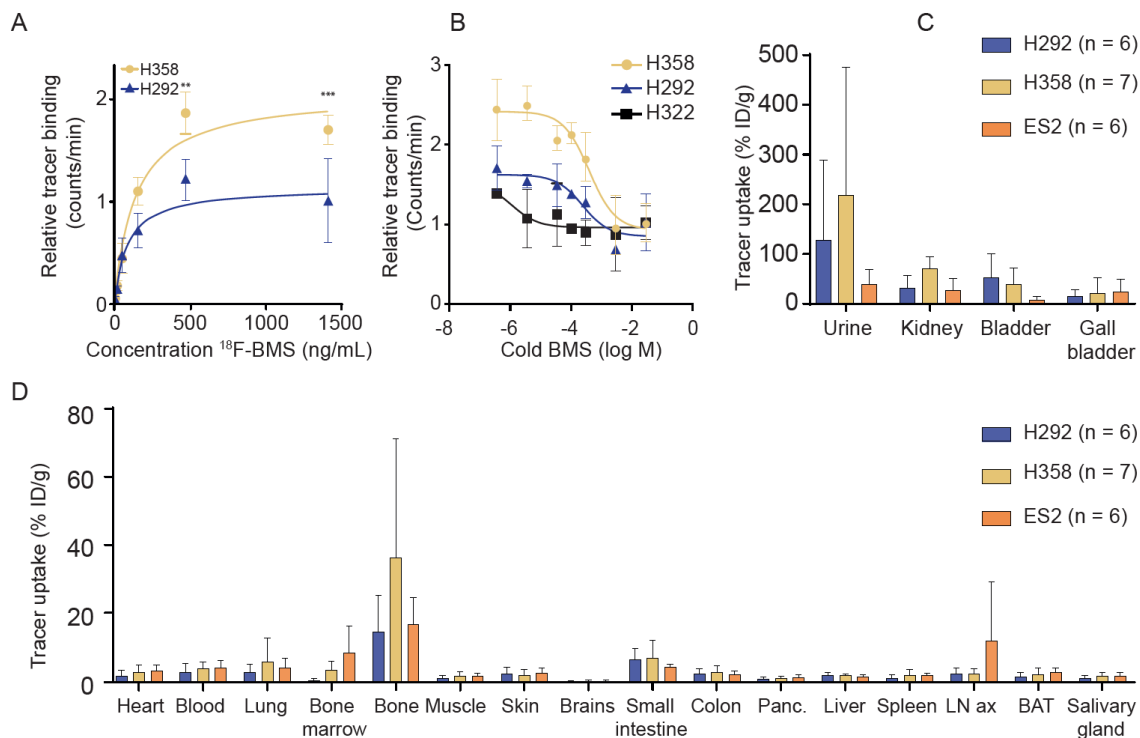

1

2 **SUPPLEMENTAL FIGURE 1.** *In vitro* tracer binding and biodistribution of <sup>18</sup>F-BMS-986192 in

3 xenograft models. **(A)** <sup>18</sup>F-BMS-986192 was added to H292 or H385 cells and incubated for 60

4 minutes at 37°C. After washing, the remaining bound counts were measured using a gamma

5 counter. Binding assays were performed in triplicate. Data is expressed relative compared to

6 H292 with the highest tracer concentration. Differences were tested using ANOVA with

7 bonferroni's multiple comparisons test, \*\* p < 0.01, \*\*\* p < 0.001. **(B)** H358, H292 and H322

8 cells were incubated with 1 MBq (corresponding to 167 ng) <sup>18</sup>F-BMS-986192 for 60 minutes at

9 37°C together with increasing concentrations of unlabeled precursor. After washing, bound

10 counts were measured using a gamma counter. Binding assays were performed in triplicate and

11 data was expressed relative to the signal of the highest blocking dose. **(C)** A 60 minute dynamic

12 PET scan was performed using <sup>18</sup>F-BMS-986192 in BALB/c nude mice with established H292,

13 H358, or ES2 xenograft tumors, followed by *ex vivo* biodistribution studies. Tracer uptake in

1 excretion organs and **(D)** other organs was assessed by measuring counts per minute in a  
2 gamma counter. Uptake is expressed as percentage of injected dose per gram (%ID/g). Panc. =  
3 pancreas, LN ax = axial lymph node, BAT = brown adipose tissue. Data is presented as mean  $\pm$   
4 SD.  
5

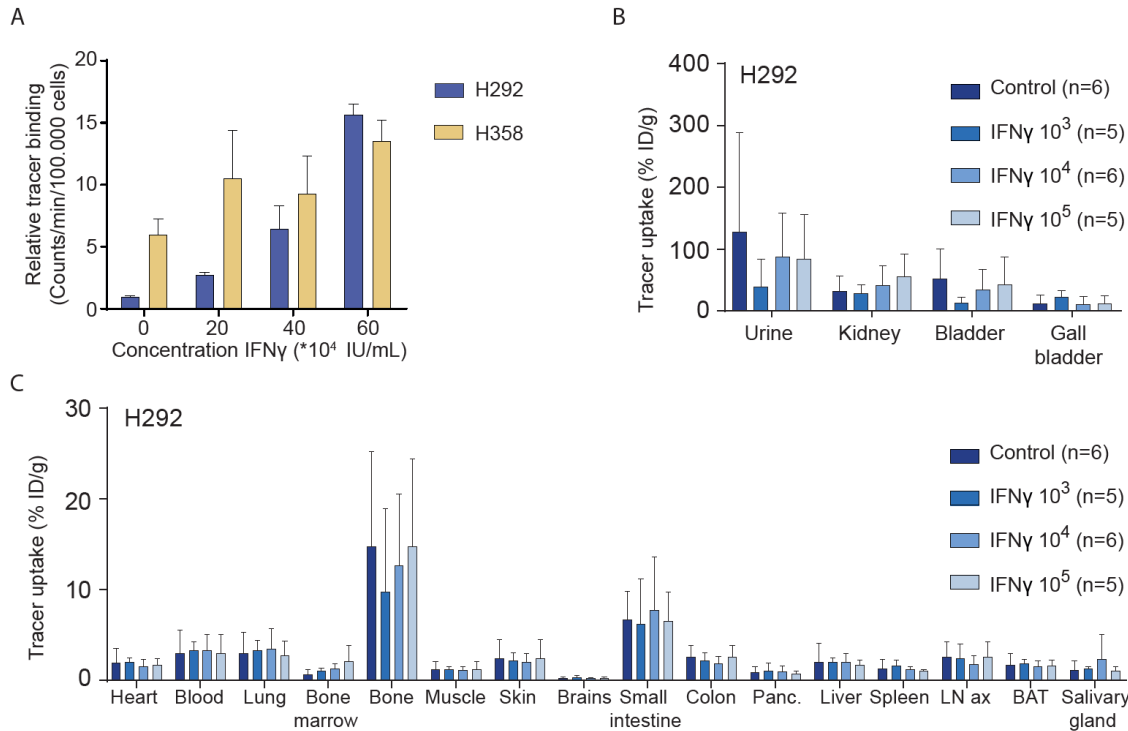

1  
 2 **SUPPLEMENTAL FIGURE 2.** IFN $\gamma$  does not influence biodistribution of <sup>18</sup>F-BMS-986192 *in vivo*. **(A)**  
 3 H292 and H358 cells were treated with a range of IFN $\gamma$  concentrations for 24 hours. Tracer  
 4 binding/100,000 cells was measured using a gamma counter and expressed relatively to untreated H292.  
 5 BALB/c nude mice with established H292 xenograft tumors were randomized between control and  
 6 different IFN $\gamma$  doses (n= 5/6 per group). After 3 days treatment by intraperitoneal injection, a 60-min  
 7 dynamic PET scan was performed using <sup>18</sup>F-BMS-986192, followed by *ex vivo* biodistribution studies.  
 8 Tracer uptake in **(B)** excretion organs and **(C)** other organs was assessed *ex vivo* by measuring counts per  
 9 minute in a gamma counter. Uptake is expressed as percentage of injected dose per gram (%ID/g). Panc.  
 10 = pancreas, LN ax = axial lymph node, BAT = brown adipose tissue. Data is presented as mean + SD.

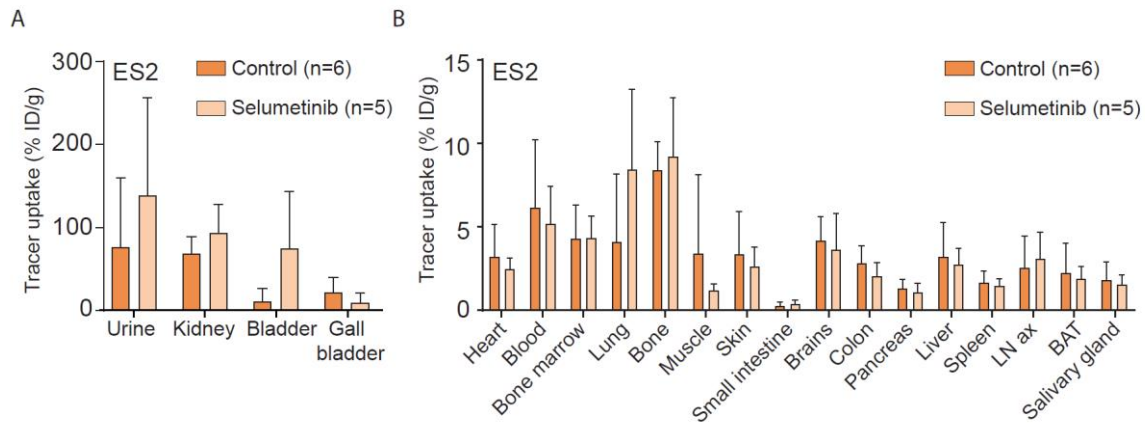

1  
2 **SUPPLEMENTAL FIGURE 3.** Selumetinib does not influence biodistribution of <sup>18</sup>F-BMS-986192 *in*  
3 *vivo*. BALB/c nude mice with established ES2 xenograft tumors were randomized between  
4 control and selumetinib treatment (n= 5/6 per group). After 24 hours treatment by  
5 oral gavage, a 60-min dynamic PET scan was performed using <sup>18</sup>F-BMS-986192, followed by *ex*  
6 *vivo* biodistribution studies. Tracer uptake in **(A)** excretion organs and **(B)** other organs was  
7 assessed *ex vivo* by measuring counts per minute in a gamma counter. Uptake is expressed as  
8 percentage of injected dose per gram (%ID/g). LN ax = axial lymph node, BAT = brown adipose  
9 tissue. Data is presented as mean + SD.

10  
11

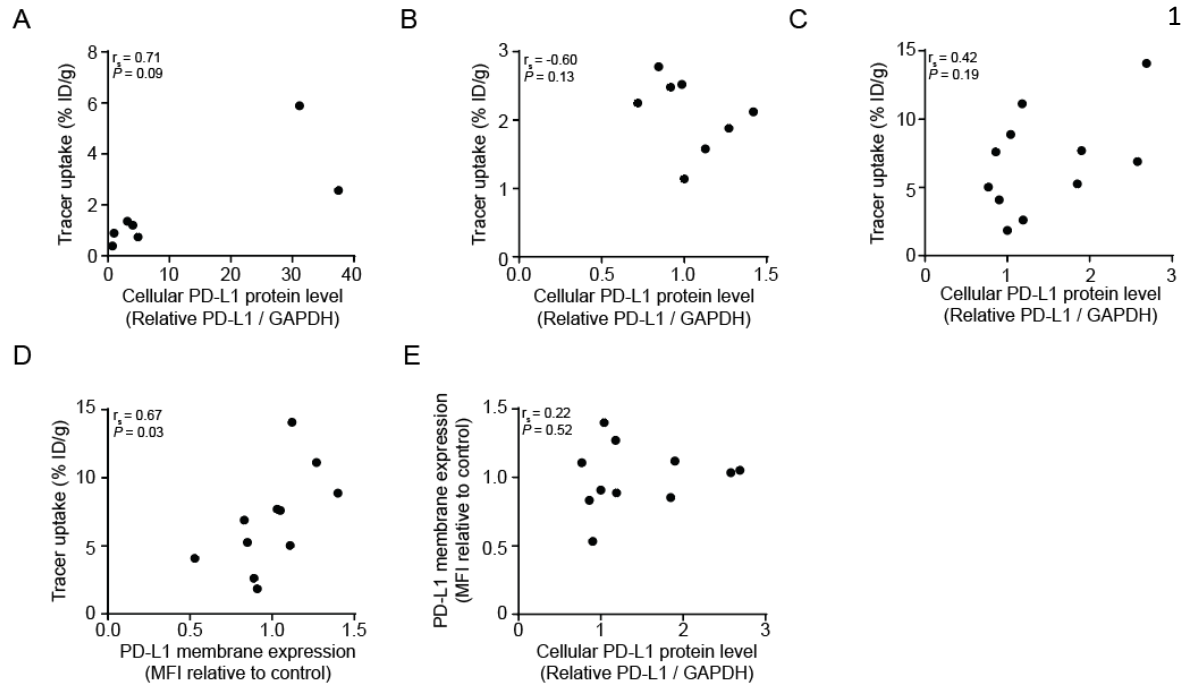

2 **SUPPLEMENTAL FIGURE 4.** Relation of PD-L1 protein and membrane expression with tracer  
 3 uptake. **(A)** Correlation of PD-L1 protein levels in Figure 1D, with *ex vivo* tracer uptake. **(B)**  
 4 Correlation of PD-L1 protein levels in Figure 2C, with *ex vivo* tracer uptake. **(C)** Correlation of PD-  
 5 L1 protein levels in Figure 3E, with *ex vivo* tracer uptake. **(D)** Correlation of PD-L1 membrane  
 6 expression in Figure 3C, with *ex vivo* tracer uptake. **(E)** Correlation of PD-L1 membrane  
 7 expression in Figure 3C with PD-L1 protein levels in level 3E.  $r_s$  = Spearman's correlation.
